# Supplementary material
Source: PubMed Central journal article supplement (PMC7843794)
Supplement: 40200_2020_604_MOESM2_ESM.pdf [file 40200_2020_604_MOESM2_ESM.pdf]

# 2

*by* F Der

---

**Submission date:** 24-Jul-2020 05:51AM (UTC-0400)

**Submission ID:** 1361547220

**File name:** Propolis\_CC33.docx (75.69K)

**Word count:** 2049

**Character count:** 11826

2

## The Effect of Propolis on Anthropometric Indices and Lipid Profile: A Systematic Review and Meta-Analysis of Randomized Controlled Trials

**Running title:** Propolis, anthropometric factors, and lipid profile.

### Abstract

**Background & objective(s):** The current evidence base regarding the impact of propolis consumption on lipid profile in humans is equivocal. Thus, we sought to investigate the impact of propolis consumption on anthropometric indices and lipid profile in this meta-analysis.

**Methods:** Cochrane Library, Scopus, PubMed, and Web of Science electronic databases were searched up to December 2019. A random-effects model used to pool effect size. The leave-one-out method used to conduct sensitivity analysis.

**Results:** Five RCTs were included in this study. Our findings indicated a significant decrease in triglyceride (TG) (WMD: -3.91 mg/dl, 95% CI: -4.22, -3.60), and a significant increase in high-density lipoprotein (HDL) (WMD: 3.41 mg/dl, 95% CI: 0.05, 6.76), however, for body mass index, weight, cholesterol (CL), and low-density lipoprotein (LDL), no significant alterations were evident.

**Conclusion:** This study revealed that consumption of propolis is associated with a reduction in TG levels, in addition to an increase in HDL levels. Nevertheless, additional research is required to further delineate the relationship between propolis consumption and lipid profile.

**Keywords:** propolis; weight; body mass index; lipid profile

## **Introduction**

Propolis is a naturally occurring, adhesive material, gathered by *Apis mellifera* L. (Honeybees), from plant sources (1). It is used by honeybees to cement the honeycombs, in combination with wax and salivary gland enzymes. In humans, propolis has been used in traditional medicine because of its free radical scavenging properties and antimicrobial effects (2). Even in contemporary medicine, propolis remains a popular over-the-counter (OTC) medication, because of its potential therapeutic applications in, among other illnesses, acne vulgaris, diabetic foot ulcers, and as a cough remedy (3).

Propolis is solid at room temperature; however, when it is heated, it becomes gelatinous with adhesive and flexible properties. It has a lipophilic nature and its color varies from yellow and green to dark brown, depending on the type of material used by the honeybees (4, 5). It is used extensively in food and beverages for the prevention and improvement of some health conditions (6). Indeed, the continued use of propolis has garnered scientific interest in its chemical composition and potential clinical applications (7). Approximately 300 constituents are found in propolis, where the major components are flavonoids, aromatic aldehyde, alcohols, beta-steroids, and terpenes. With regards to the flavonoids; flavanols, flavones, flavanones, dihydroflavonols, and chalcones are the most abundant (8), and possess free radical scavenging potential, especially in reactive nitrogen species, hydrogen peroxide, and reactive oxygen species (9, 10). Moreover, flavonoids can contribute to the inhibition of the Xanthine oxidase reaction, chelating the metal ions involved in the development of free radicals (11), thus, preventing peroxidation of lipids and protecting the cell membrane. Propolis also comprises another powerful antioxidant, caffeic acid phenyl ester, which prevents the formation of free radicals (12). Overall, propolis appears to prevent the peroxidation of lipids, regulates carbohydrate and lipoprotein metabolism, regulates

gene expression, suppresses the activity of cytokines, attenuates endothelial dysfunction, and prevents aggregation of cytokines (13-16).

However, despite an increase in the number of studies evaluating the effect of propolis on weight, body mass index, and lipid profile, to the best of the authors knowledge, no study has attempted to summarize the effect of propolis on the aforementioned parameters. Thus, we sought to investigate the effect of propolis consumption on anthropometric indices and lipid profile.

### **Material and methods**

The present study was conducted according PRISMA statement (17). Searches were conducted in Cochrane Library, Web of Science, PubMed, and Scopus, up to December 2019. Our search strategy in detailed in supplemental Table 1. The search was conducted by two of the authors. Disagreements in study selection were resolved through panel discussions method.

### **Eligibility Criteria**

Clinical studies that investigated propolis supplementation and its' resultant effect on weight, BMI, cholesterol, triglyceride, LDL, and HDL were included in this study, if the following criteria were met; followed a RCT study design, conducted an intervention using propolis, and, sufficient baseline and post-intervention data were available. Furthermore, we adopted the following exclusion criteria, where non-interventional studies, studies with no placebo group, and studies that did not have sufficient data at baseline and post-intervention, were excluded.

### **Data extraction and Quality assessment**

Two authors (J.R and A.S) evaluated the titles/abstracts, independently. Full-texts of the eligible articles were examined to extract the required information. In any instance of disagreement,

consensus was achieved through panel discussion with the author team. The Cochrane Collaboration tool (18) was used to assess risk of bias.

### Statistical analysis

The SD change of the mean difference was calculated using the following formula:  $SD^2 = [(SD_{baseline}^2 + SD_{final}^2) - (2 \times R \times SD_{baseline} \times SD_{final})]$ . In order to calculate the pooled effect size, a random-effects model was employed. The  $I^2$  test was used to evaluate heterogeneity, whilst the Begg's and Egger's tests were used to assess publication bias. STATA 11 software (StataCorp, College Station, Texas, USA) used to conduct all statistical analyses.

### Results:

As depicted in Figure 1, following the primary systematic search, and removal of duplicated studies, 915 papers were identified for title and abstract screening. Accordingly, 899 papers were excluded due to irrelevant title and abstracts, resulting in 16 papers included for full text evaluation. Of the 16 studies, 10 studies did not meet our inclusion criteria, so they were excluded; subsequently, five papers were included in the present study (19-23).

### Study characteristics

The characteristics of the included studies are detailed in Table 1, where all were conducted on both genders and published between 2017-2019. The included studies were conducted in Iran (19, 20, 22), Chile (21), and Japan (23), respectively, and utilized a mean propolis dose of 906 mg per day, with a mean age of 53.77y. Four studies were conducted on diabetic patients, and one on 'at risk' adults. The mean intervention duration was 10 weeks, whilst the quality of included studies was good (Figure 2).

## Meta-analysis results

Four studies, including 278 participants, reported weight and BMI as anthropometric outcome measures. According to Figure 3, combined results of these four studies did not show any significant change in the propolis group, vs. control group, in weight (WMD: -0.69 kg, 95% CI: -1.98, 0.60,  $I^2 = 0\%$ ) and BMI (WMD: -0.22 kg/m<sup>2</sup>, 95% CI: -0.66, 0.22,  $I^2 = 0\%$ ) (19-22). There was no significant heterogeneity evident in the pooled results of weight and BMI.

Four studies, with a total of 298 participants, reported lipid profile as an outcome measure (CL, TG, HDL, and LDL) (19-21, 23). Pooled results of these studies show no significant change in CL (WMD: 4.69 mg/dl, 95% CI: -1.09, 22.48,  $I^2 = 94\%$ ) and LDL (WMD: -0.24 mg/dl, 95% CI: -5.72, 5.23,  $I^2 = 55\%$ ) levels, however, TG (WMD: -3.91 mg/dl, 95% CI: -4.22, -3.60,  $I^2 = 0\%$ ) and HDL (WMD: 3.41 mg/dl, 95% CI: 0.05, 6.76,  $I^2 = 99\%$ ) were significantly lower and higher, respectively, compared to the control group.

## Risk of bias

A funnel plot of included studies did not show any asymmetry between included studies (Supplemental Figure 1). Furthermore, the Begg's and Egger's tests were non-significant for weight ( $p = 0.17$ ,  $p = 0.33$ ), BMI ( $p = 0.68$ ,  $p = 0.62$ ), CL ( $p = 0.49$ ,  $p = 0.45$ ), TG ( $p = 0.49$ ,  $p = 0.85$ ), HDL ( $p = 0.99$ ,  $p = 0.48$ ), and LDL ( $p = 0.34$ ,  $p = 0.44$ ), respectively.

## Discussion

In the present study, we pooled results from five trials concerning the effect of propolis consumption on anthropometric indices and lipid profile. According to results consumption of propolis did not yield any significant effect on weight, BMI, CL, and LDL. However, the pooled

estimates demonstrated that consumption of propolis was associated with a significant decrease in TG levels, whilst HDL levels were significantly increased.

Propolis, colloquially known as bee glue, has long been reported to have various beneficial health effects. Indeed, these effects are attributed to anti-inflammatory (24), antioxidant (25), anti-microbial (26), and immunomodulatory properties (27). Propolis is known to possess over 300 different compounds, and the main biologically active ingredients are flavonoids, polyphenols, vitamins, amino acids, and caffeic acid phenethyl ester, respectively (28). These compounds combat oxidative stress by eliminating the release of reactive oxygen species, such as free radicals, hydrogen peroxide, and nitric oxide (29).

In vivo and in vitro studies have demonstrated the potential cardioprotective properties of propolis via inhibition of LDL peroxidation (30), limitation of inflammatory cytokines (31), regulation of glucose metabolism (32), prevention of atherosclerotic plaque formation (33), as well as improvement of endothelial function and decreases in aggravation of thrombocytes (34). These effects can be particularly beneficial for patients with existing metabolic abnormalities, such as those with type 2 diabetes mellitus. However, despite a large number of experimental data, there is a lack of human studies to have evaluated the clinical efficacy of propolis.

In this study, individuals receiving propolis showed statistically significant reductions in the levels of TG, in addition to increased levels of HDL, compared to the control group. These outcomes may be promising in the management of individuals with altered lipid profile, conceivably representing an alternative to many pharmaceutical options. In particular, Hesadi et al and Samadi et al, respectively, reported significantly lower LDL levels by the end of the trial (21). Samadi and colleagues also demonstrated additional benefits through reductions in total cholesterol levels, while, Zakerkish et al showed propolis could elicit an increased concentration of HDL (20).

A putative mechanism for the beneficial effect of propolis on lipid profile may be that ATP-binding cassette transporters, which are associated with HDL formation and peripheral tissue efflux, are expressed to a greater extent in the liver proteins following supplementation (20). Furthermore, Mujica et al., demonstrated, in a RCT, that 90 days consumption of propolis significantly increased HDL-C levels (22), and Zakerkish et al. demonstrated that, in T2DM patients, supplementation with Iranian propolis yielded increases in HDL-C. Indeed, it is accepted that HDL-C represents an significant lipoparticle which is capable of providing protection against various cardiovascular diseases, prevention of LDL oxidation, and neutralization of atherogenic effects within the arterial walls (20).

11

This study represents the first meta-analysis to have examined the influence of propolis consumption on anthropometric indices and lipid profile. Accordingly, there are some strengths and limitations that must be recognized. One of the biggest strengths of this study is the methodological approach, where the results from five RCTs were shown to be consistent, as demonstrated by Funnel plots. Moreover, four out of five included studies were double-blinded, two of which were placebo-controlled. Finally, the bias assessment conducted in our study demonstrated minimal bias, allowing us to assert veracity in our results. Notwithstanding the strengths highlighted above; there are several limitations that should be addressed. First, studies evaluated different types of propolis. Indeed, it is not certain to what extent they differ in biological activity and whether there could be any clinical implication to their interchangeable use. Second, discrepancies existed in the doses used per day; however, to date, there is no standard dosage currently advocated, and thus, future investigations should delineate the effects of various doses of propolis. Third, despite the robust methodology of the trials analyzed, the study population was small; it is therefore difficult to correctly estimate the exact impact of propolis in a wider



population. Fourth, the intervention period in all studies was limited to 3 months, which might not be sufficient to draw definite conclusions regarding the sustainability and long-term effects of propolis.

Future studies are encouraged to recruit large sample sizes, using crossover study designs, to yield more robust evidence. In addition, investigations should focus on the long-term evaluation, dosage comparison, as well as considering the type of propolis, to provide greater insights into the clinical efficacy of propolis.

### **Conclusion**

In conclusion, our results show that, following propolis consumption, TG levels were significantly decreased, whilst HDL levels were significantly increased. However, further research is required to better elucidate the relationship between propolis consumption and lipid profile markers.

1

### **Acknowledgment**

This study is associated with project NO. 1398/10544 From Student Research Committee, Shahid Beheshti University of Medical Sciences (SBMU), Tehran, Iran. We are indebted to the Student Research Committee and Research & Technology Chancellor in SBMU for their financial support of this study.

### **Conflict of interest**

None.

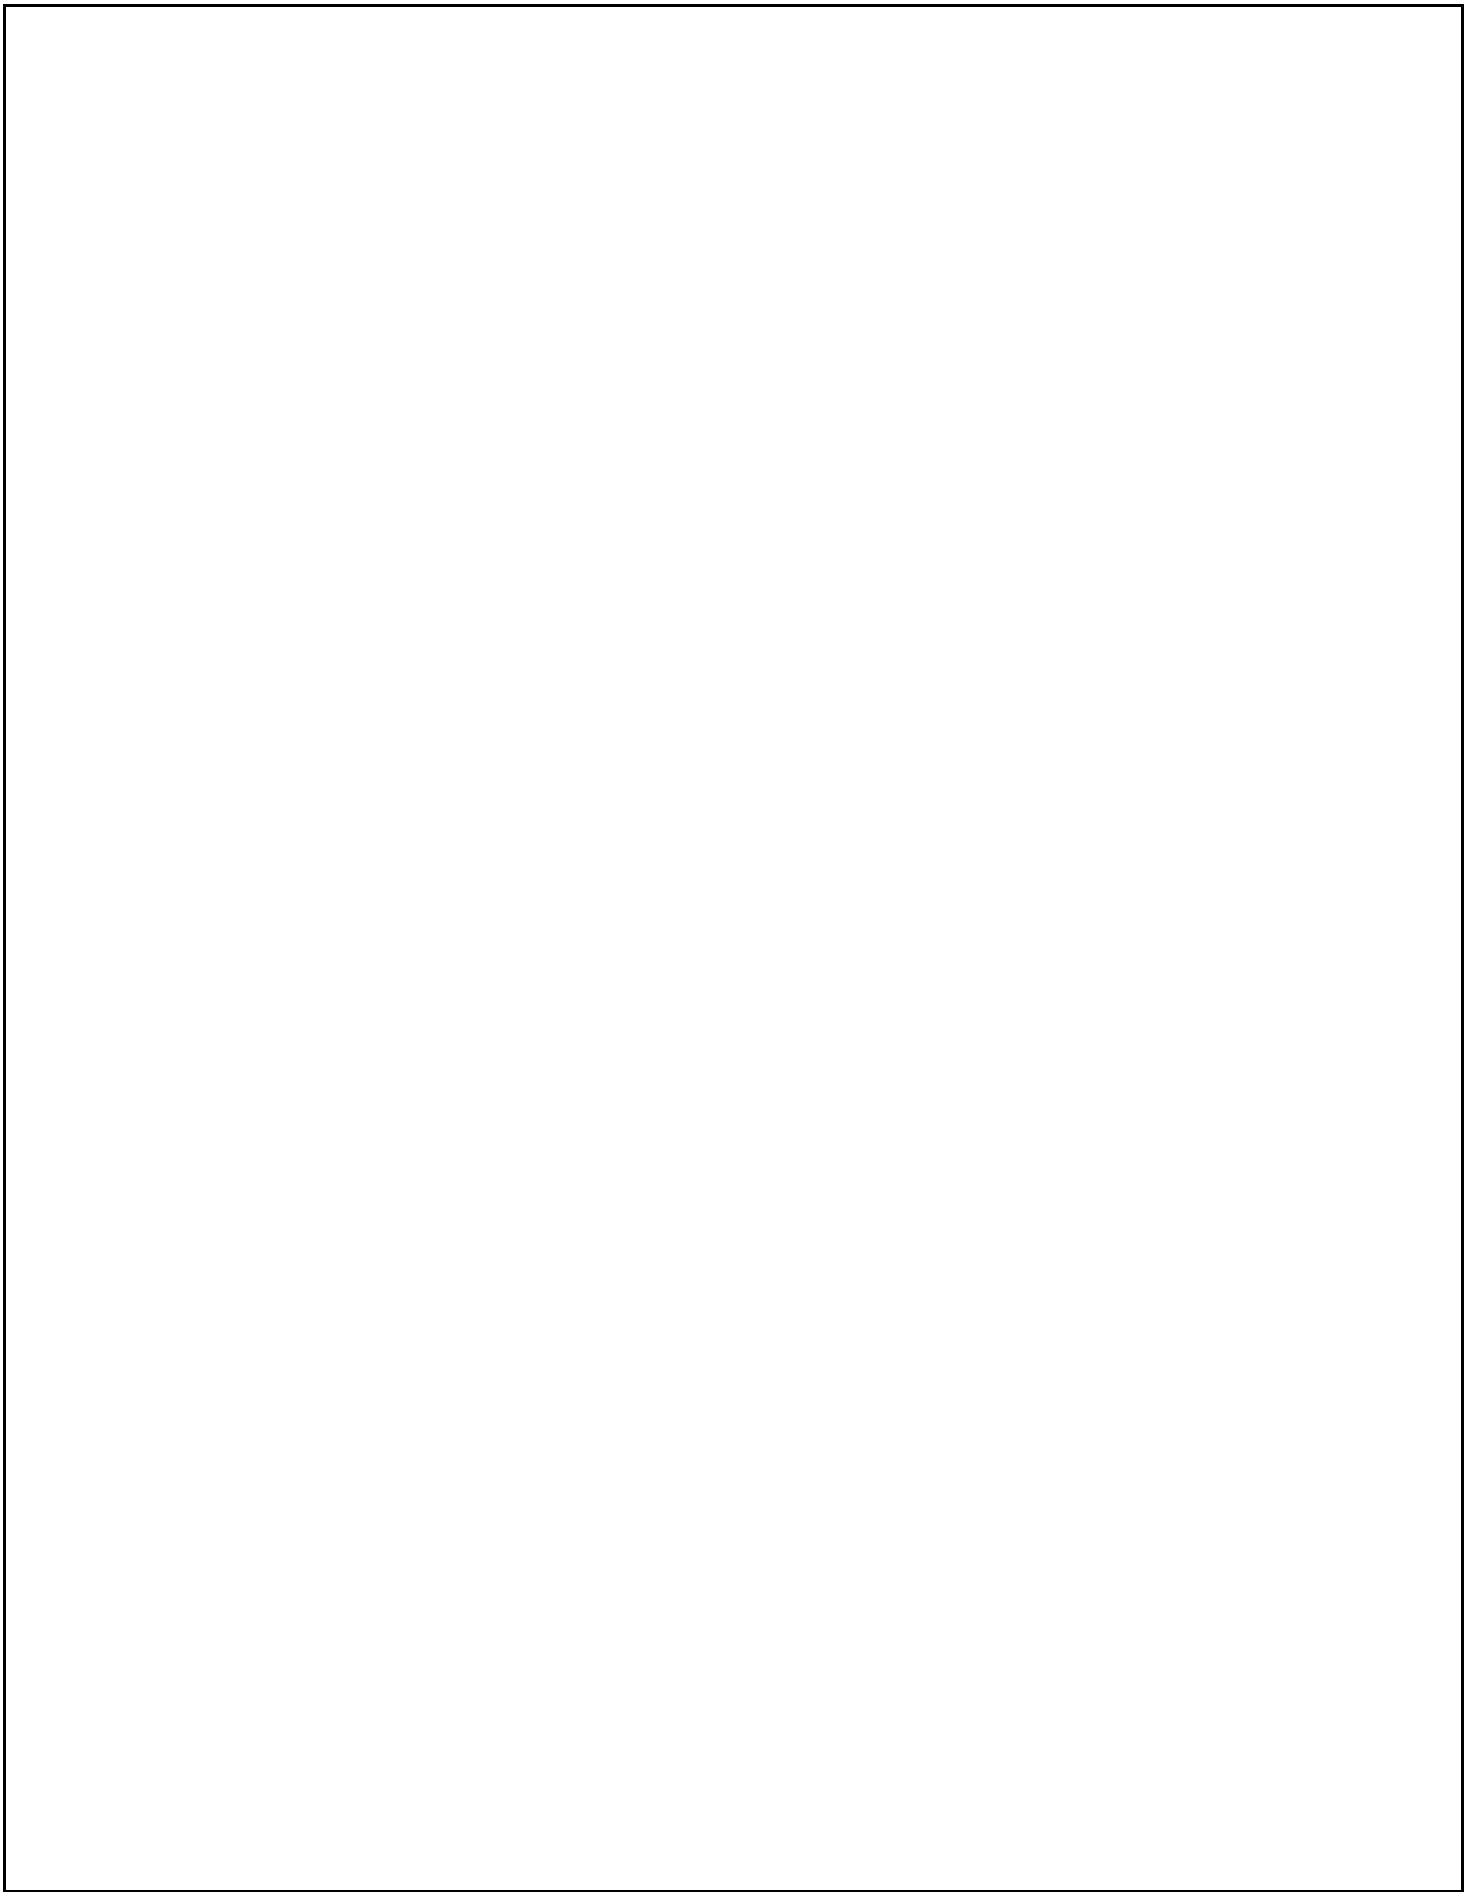

## ORIGINALITY REPORT

15%

SIMILARITY INDEX

10%

INTERNET SOURCES

11%

PUBLICATIONS

8%

STUDENT PAPERS

## PRIMARY SOURCES

|   |                                                                                                                                                                                                                                                                                                    |    |
|---|----------------------------------------------------------------------------------------------------------------------------------------------------------------------------------------------------------------------------------------------------------------------------------------------------|----|
| 1 | <a href="http://www.tandfonline.com">www.tandfonline.com</a><br>Internet Source                                                                                                                                                                                                                    | 3% |
| 2 | <a href="http://pureportal.coventry.ac.uk">pureportal.coventry.ac.uk</a><br>Internet Source                                                                                                                                                                                                        | 1% |
| 3 | Jalaedin Mirzay Razaz, Jamal Rahmani, Hamed Kord Varkaneh, Jacqueline Thompson, Cain Clark, Hebatullah M. Abdulazeem. "The health effects of medical nutrition therapy by dietitians in patients with diabetes: A systematic review and meta-analysis", Primary Care Diabetes, 2019<br>Publication | 1% |
| 4 | <a href="http://link.springer.com">link.springer.com</a><br>Internet Source                                                                                                                                                                                                                        | 1% |
| 5 | Submitted to Endeavour College of Natural Health<br>Student Paper                                                                                                                                                                                                                                  | 1% |
| 6 | Jamal Rahmani, Elham Bazmi, Cain Clark, Seyed Saeed Hashemi Nazari. "The effect of Saffron supplementation on waist                                                                                                                                                                                | 1% |

circumference, HA1C, and glucose metabolism: A systematic review and meta-analysis of randomized clinical trials", *Complementary Therapies in Medicine*, 2020

Publication

---

**7** Sajedah Jandari, Elaheh Hatami, Rahele Ziaei, Abed Ghavami, Amin Mokari Yamchi. "The effect of pomegranate (*Punica granatum*) supplementation on metabolic status in patients with type 2 diabetes: A systematic review and meta-analysis", *Complementary Therapies in Medicine*, 2020 **1%**

Publication

---

**8** R. Keren, E. Chan. "A Meta-analysis of Randomized, Controlled Trials Comparing Short- and Long-Course Antibiotic Therapy for Urinary Tract Infections in Children", *PEDIATRICS*, 2002 **1%**

Publication

---

**9** [www.oncotarget.com](http://www.oncotarget.com) **1%**

Internet Source

---

**10** [www.annualreviews.org](http://www.annualreviews.org) **1%**

Internet Source

---

**11** [www.hindawi.com](http://www.hindawi.com) **<1%**

Internet Source

---

**12** Hamed Kord-Varkaneh, Ehsan Ghaedi, Ali **<1%**

Nazary-Vanani, Hamed Mohammadi, Sakineh Shab-Bidar. "Does cocoa/dark chocolate supplementation have favorable effect on body weight, body mass index and waist circumference? A systematic review, meta-analysis and dose-response of randomized clinical trials", *Critical Reviews in Food Science and Nutrition*, 2018

Publication

---

13

Submitted to Normandale Community College

Student Paper

<1%

---

14

Hamed Mohammadi, Abed Ghavami, Amir Hadi, Gholamreza Askari, Michael Symonds, Maryam Miraghajani. "Effects of pro-/synbiotic supplementation on anthropometric and metabolic indices in overweight or obese children and adolescents: A systematic review and meta-analysis", *Complementary Therapies in Medicine*, 2019

Publication

---

15

[onlinelibrary.wiley.com](http://onlinelibrary.wiley.com)

Internet Source

<1%

---

16

Papadakis, J.A.. "Treating dyslipidaemia in non-insulin-dependent diabetes mellitus - a special reference to statins", *Journal of Diabetes and Its Complications*, 200107/08

Publication

---

17

Banafsheh Jafari Azad, Elnaz Daneshzad, Ali Pasha Meysamie, Fariba Koohdani. "Chronic and acute effects of cocoa products intake on arterial stiffness and platelet count and function: A systematic review and dose-response Meta-analysis of randomized clinical trials", *Critical Reviews in Food Science and Nutrition*, 2020

Publication

<1%

---

Exclude quotes Off

Exclude matches Off

Exclude bibliography Off
